# Supplementary material
Source: PubMed Central journal article supplement (PMC4114731)
Supplement: NIHMS604437-supplement-Figure_S1.pdf [file NIHMS604437-supplement-Figure_S1.pdf]

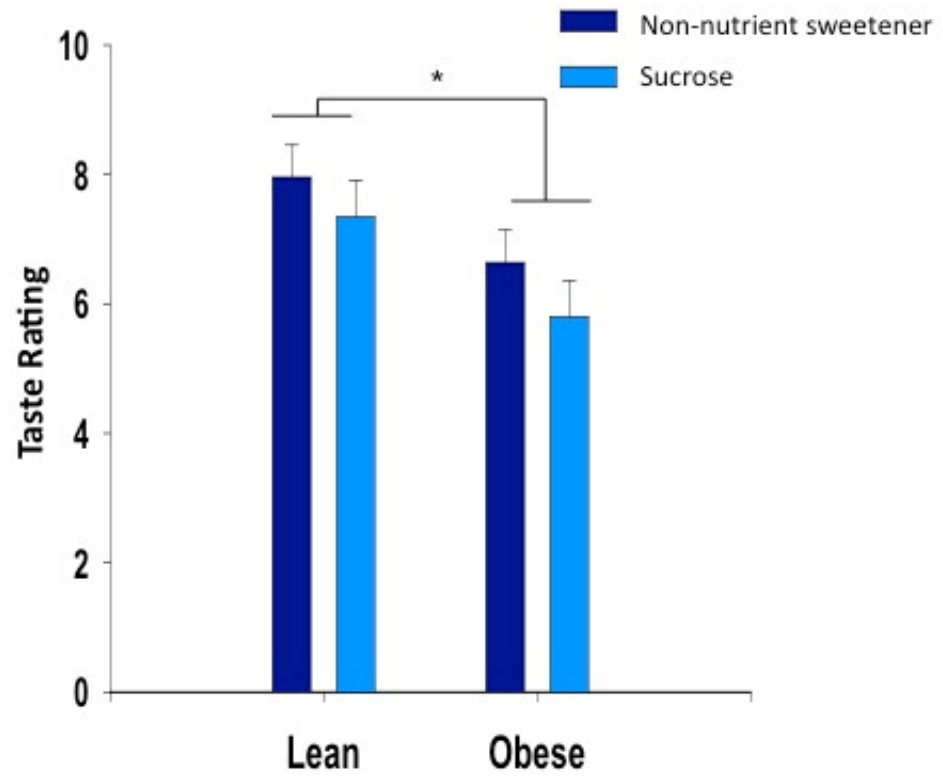

**Supplemental Figure 1.** Comparing taste ratings of sucrose and non-nutrient sweetened beverages between obese and lean subjects (\* $p < 0.05$ ).

Subjective taste ratings were quantified using a 10-point VAS, from “bad = 0” to “good = 10”.
